# Supplementary material for: Sulfur encapsulation by MOF-derived CoS2 embedded in carbon hosts for high-performance Li–S batteries
Source: Royal Society of Chemistry journal article supplement (doi:10.1039/c9ta06947j), 2019-01-01
Supplement: c9ta06947j1.pdf [file c9ta06947j1.pdf]

## Supporting Information

### Sulfur Encapsulation by MOF-Derived CoS<sub>2</sub> Embedded in Carbon

### Hosts for High-Performance Li–S Batteries

Na Zhang,<sup>†, #</sup> Yao Yang,<sup>†, #</sup> Xinran Feng,<sup>†, §</sup> Seung-Ho Yu,<sup>†, ⊥</sup> Jeessoo Seok,<sup>†</sup>

David A. Muller,<sup>‡, Δ</sup> and Héctor D. Abruña<sup>†, \*</sup>

<sup>†</sup> Baker Laboratory, Department of Chemistry and Chemical Biology, Cornell University, Ithaca, New York, 14853, United States

<sup>‡</sup> School of Applied and Engineering Physics, Cornell University, Ithaca, New York 14853, United States

<sup>§</sup> Cornell High Energy Synchrotron Source (CHESS), Cornell University, Ithaca, New York 14850, United States

<sup>Δ</sup> Kavli Institute for Nanoscale Science, Cornell University, Ithaca, New York 14853, United States

<sup>⊥</sup> Department of Chemical and Biological Engineering, Korea University, 145 Anam-ro, Seongbuk-gu, Seoul 02841, Republic of Korea

\* Corresponding author: [hda1@cornell.edu](mailto:hda1@cornell.edu)

<sup>#</sup> N.Z. and Y.Y. contributed equally to this work.

#### **This file includes:**

Figure S1-S15, Table S1 and references.

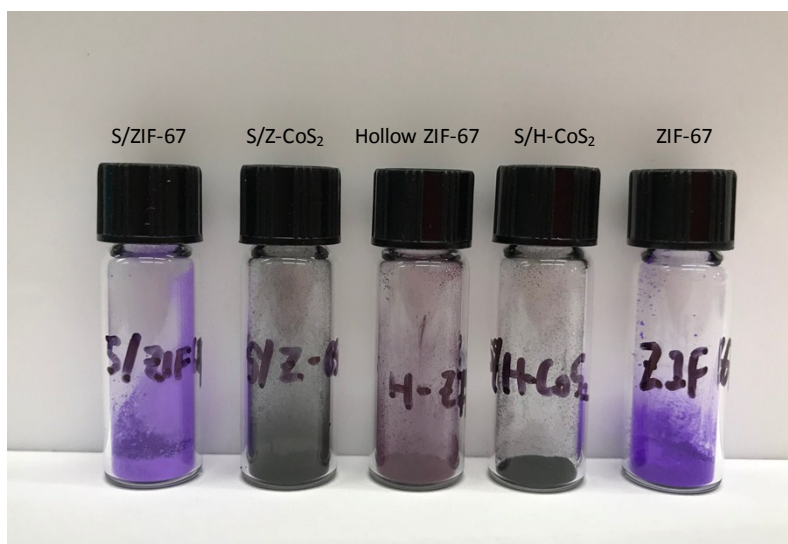

**Figure S1.** Photographs of samples S/ZIF-67, S/Z-CoS<sub>2</sub>, hollow ZIF-67, S/H-CoS<sub>2</sub> and ZIF-67. Purple S/ZIF-67 was transformed to the black S/Z-CoS<sub>2</sub> composite via the heat treatment. After the solid ZIF-67 was treated with tannic acid, the dark purple hollow ZIF-67 was obtained. The sample turned black when the hollow ZIF-67 was mixed with sulfur and went through the heat treatment.

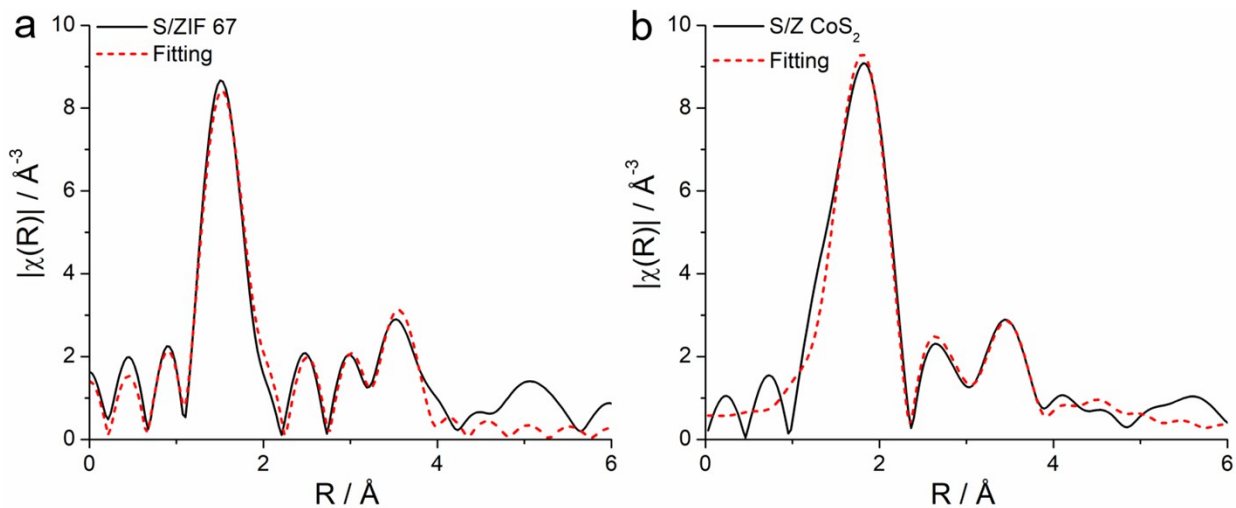

**Figure S2.** EXAFS profiles and fitting results for (a) S/ZIF-67 and (b) S/Z-CoS<sub>2</sub> composites. The fitting was performed within a Welch window between 1 and 5.5 Å. ZIF-67 and CoS<sub>2</sub> standard references were used to fit the experimental data. The R-factors of fittings results are 0.027 for S/ZIF-67 and 0.013 for S/Z-CoS<sub>2</sub>. An R factor less than 0.05 usually indicates a good quality of fit.

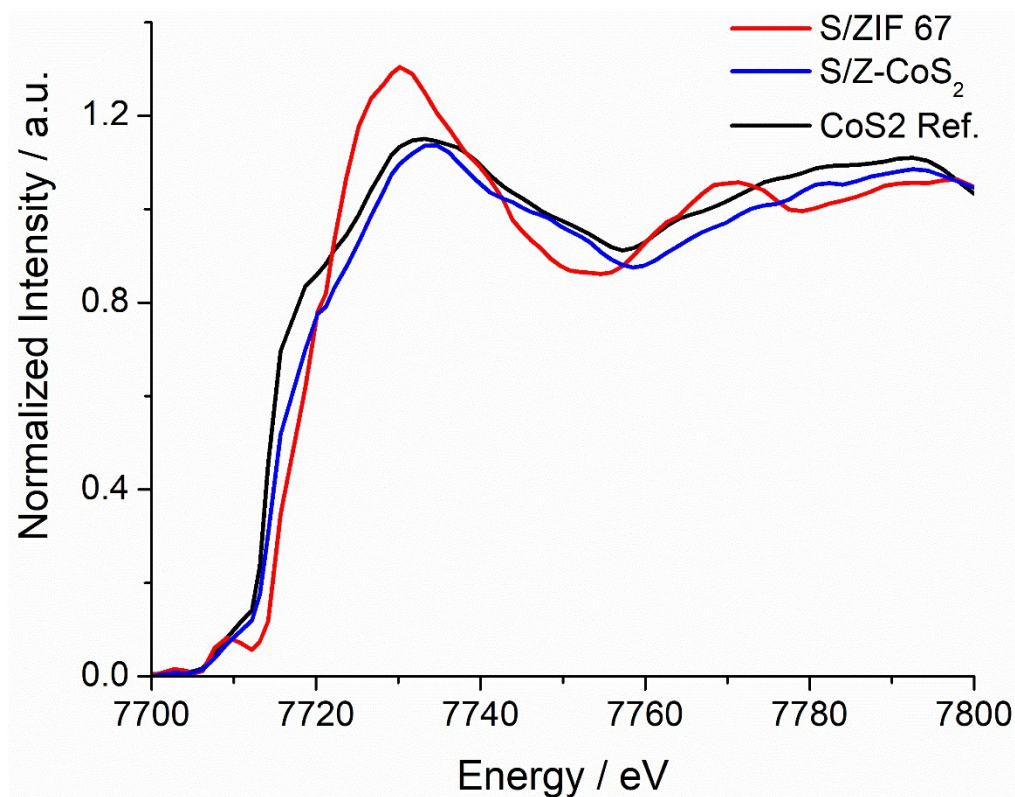

**Figure S3.** XANES spectra of the Co K-edge of S/ZIF-67 and S/ZIF-67 derived CoS<sub>2</sub> (S/Z-CoS<sub>2</sub>) composites. The XANES spectrum of S/Z-CoS<sub>2</sub> exhibits similar features as for S/ZIF-67. The shift to lower energies of S/Z-CoS<sub>2</sub>, relative to that of S/ZIF-67, suggests a decrease in the oxidation state of Co during the heat treatment.

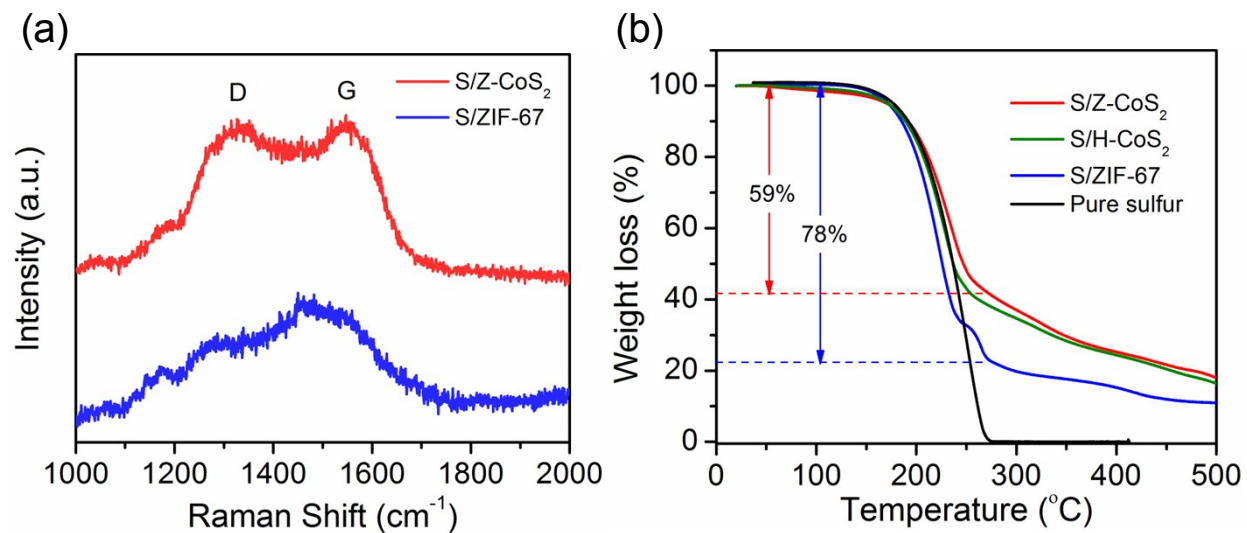

**Figure S4.** (a) Raman spectra of S/Z- $\text{CoS}_2$  and S/ZIF-67. (b) TGA curves of S/Z- $\text{CoS}_2$ , S/ZIF-67, S/H- $\text{CoS}_2$  and pure sulfur at a ramp rate of  $10\text{ }^{\circ}\text{C min}^{-1}$  in Ar.

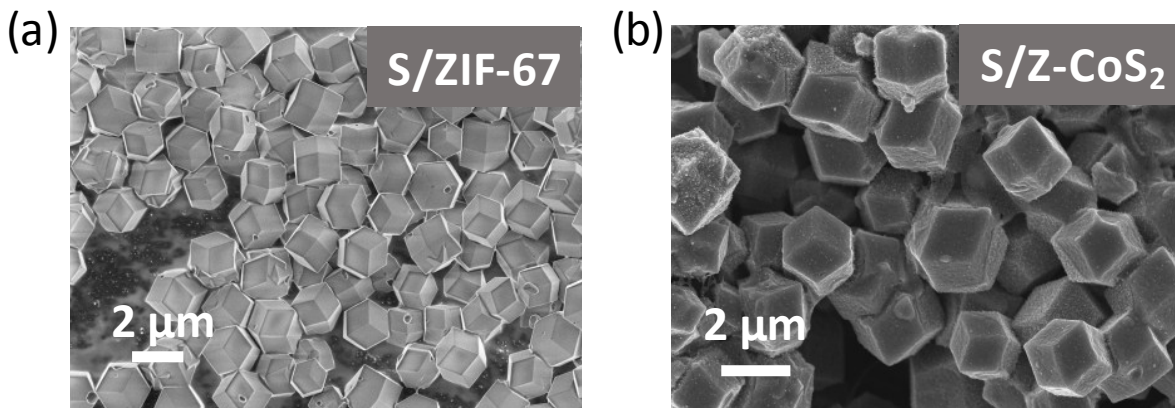

**Figure S5.** Low magnification SEM images of (a) S/ZIF-67 and (b) S/Z- $\text{CoS}_2$ .

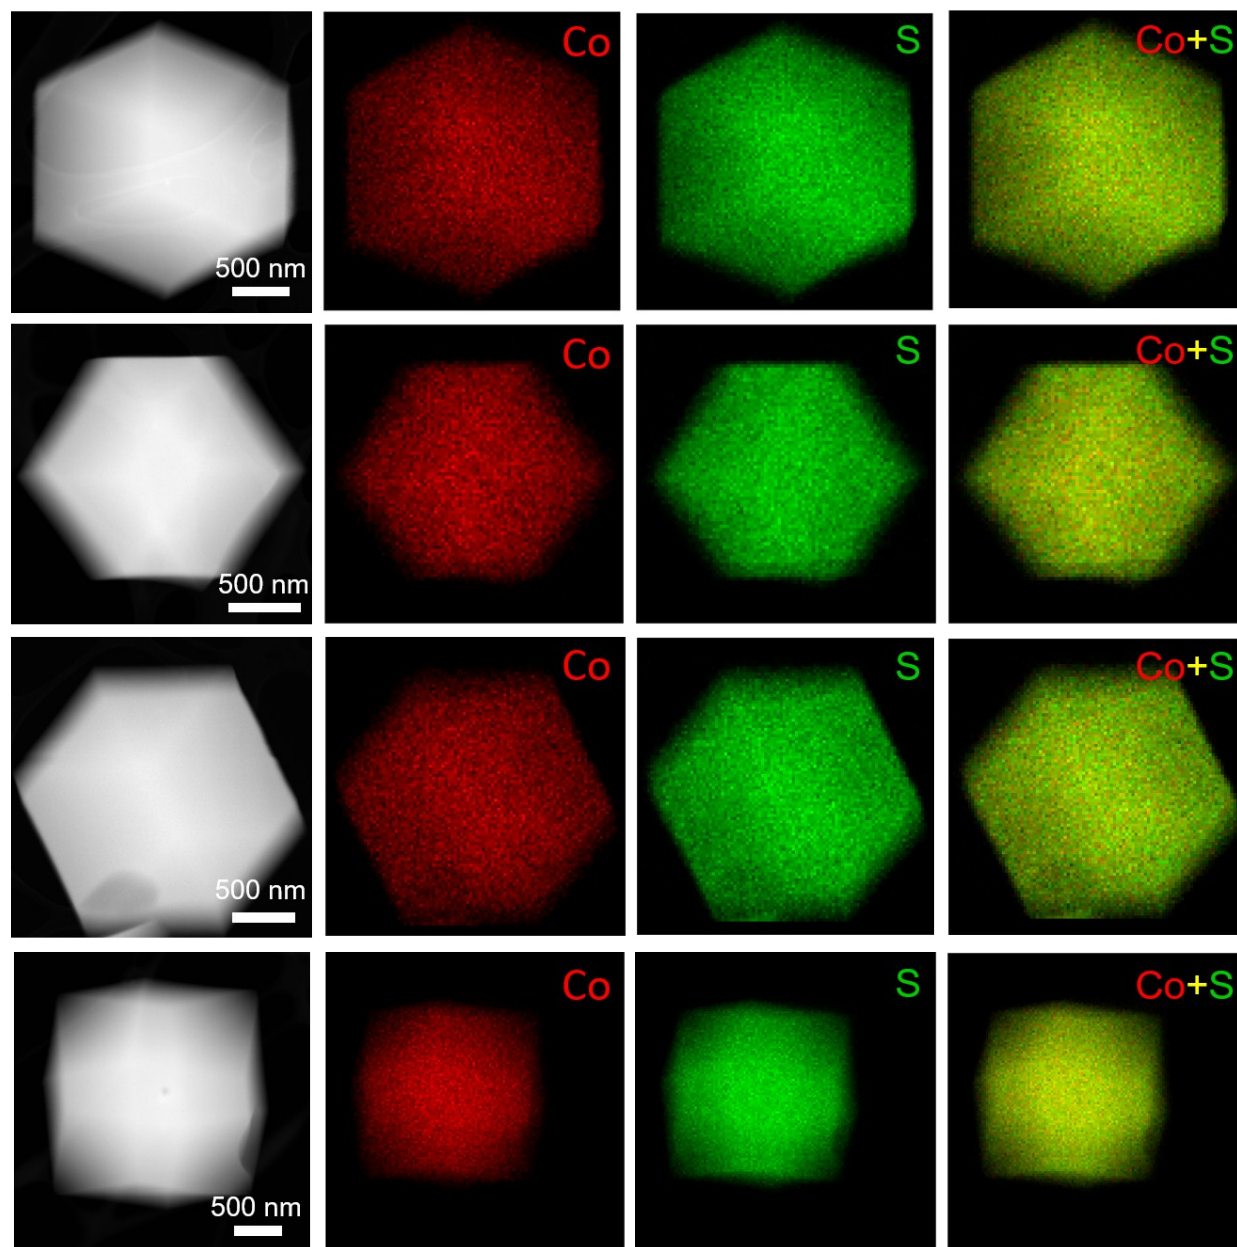

**Figure S6.** Cryo-STEM images of S/ZIF-67 composite particles and the corresponding maps of Co (red), S (green) and color overlay (yellow) of Co and S.

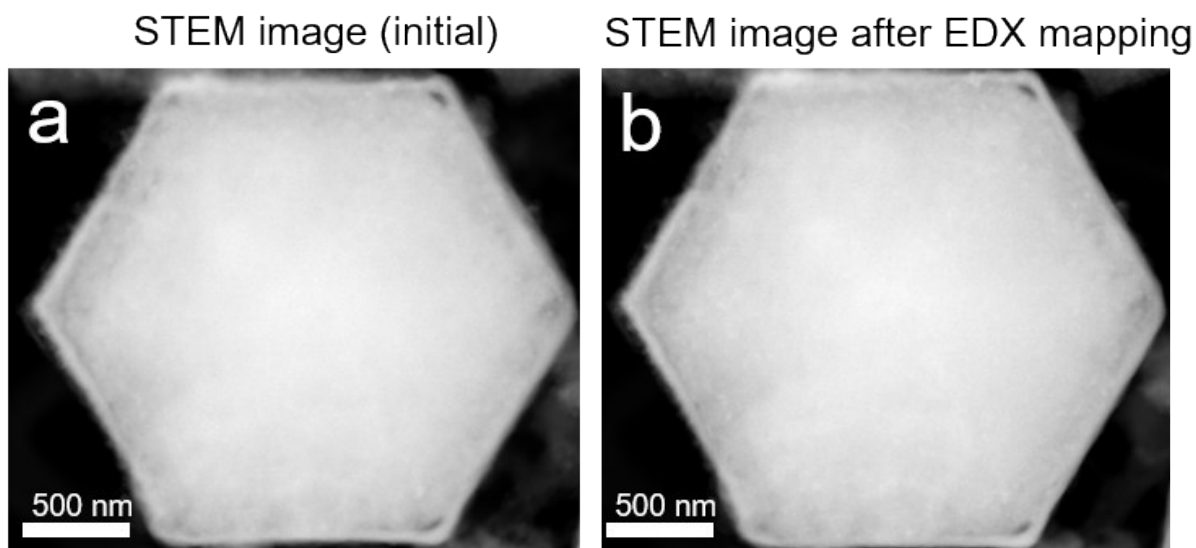

**Figure S7.** (a-b) Cryo-STEM images of S/ZIF-67-derived CoS<sub>2</sub> at its initial state and after EDX mapping, respectively, suggesting no noticeable beam damage during EDX mapping. EDX maps were acquired for 10 min to achieve more than 100 counts/pixel for sulfur and more than 50 counts/pixel for cobalt, with a beam voltage of 200 keV, a beam dose of 6-7 e/(nm<sup>2</sup> · s) and a pixel size of 128 × 128. Beam damage of all other STEM-EDX maps was routinely examined before and after EDX mapping.

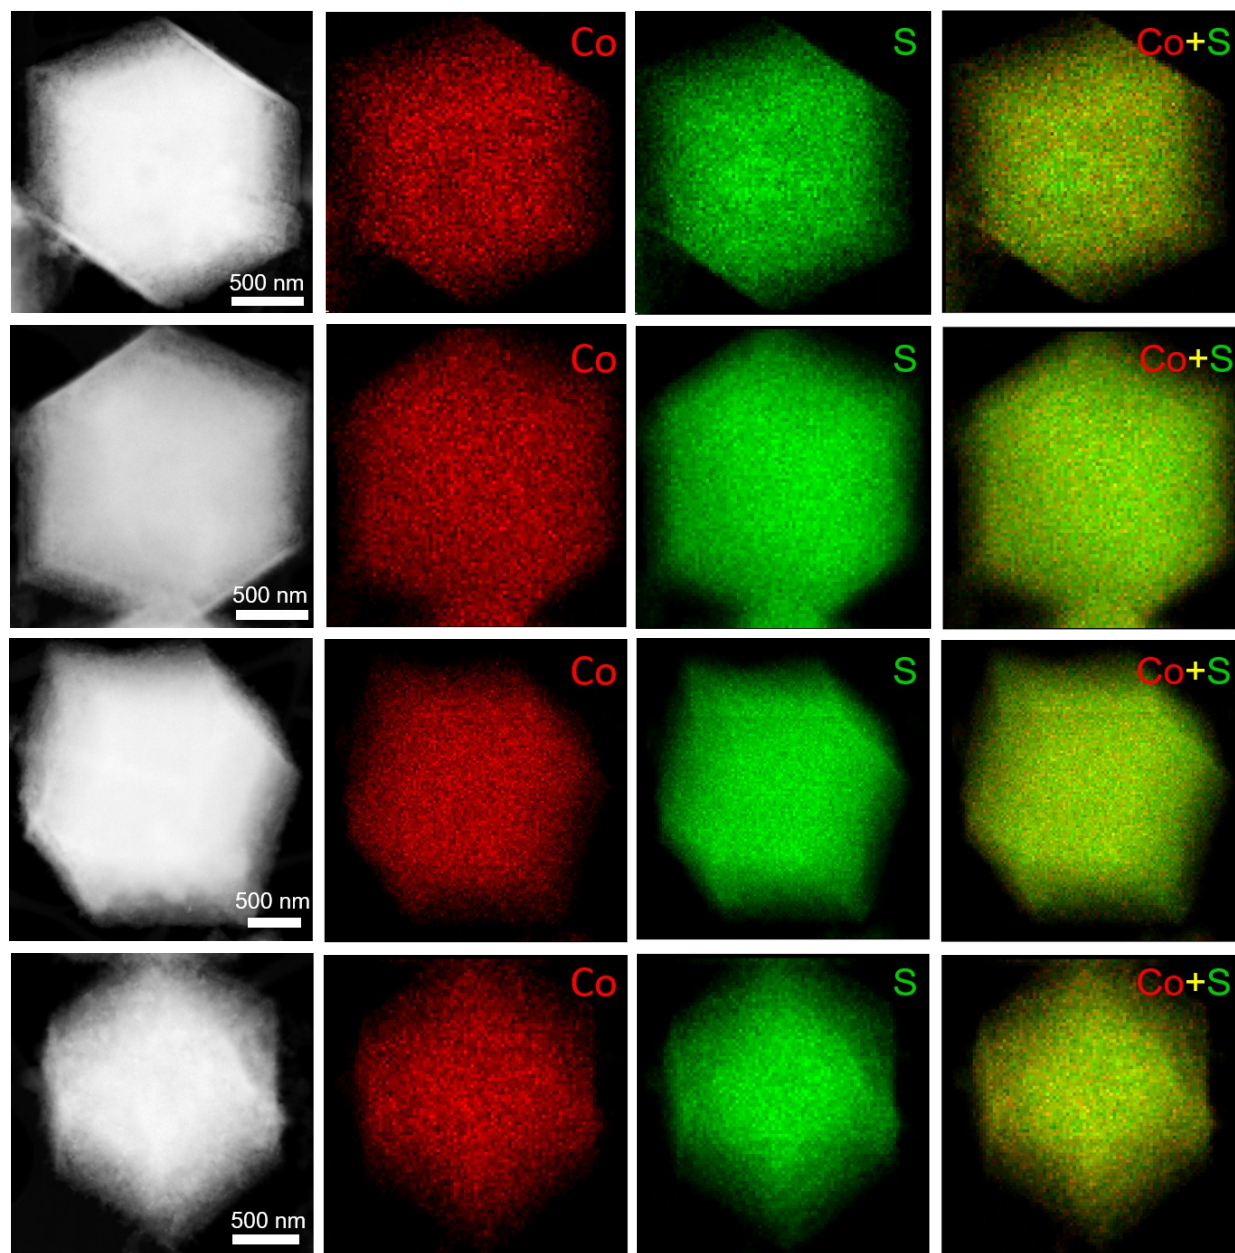

**Figure S8.** Cryo-STEM images of S/ZIF-67-derived CoS<sub>2</sub> (S/Z-CoS<sub>2</sub>) composite particles and the corresponding EDX elemental maps of Co (red), S (green) and color overlay (yellow) of Co and S.

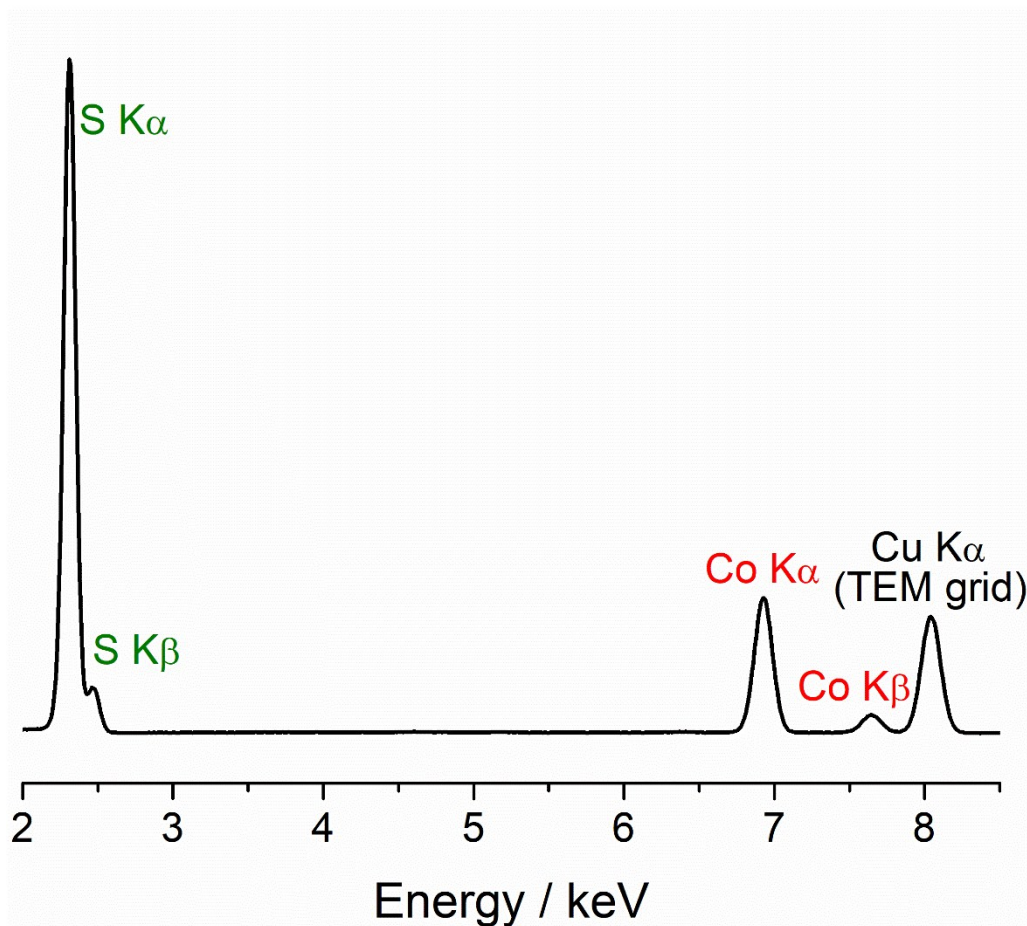

**Figure S9.** EDX spectrum of S/ZIF-67-derived CoS<sub>2</sub> composite, corresponding to the particle in Figure 3g. The S/Co atomic ratio was quantified to be 6.7:1 based on S and Co K-edges, which is quite consistent with the S/Co ratio (about 8:1) calculated from TGA results. This suggests that the majority of the sulfur is confined within the cage of ZIF-67-derived CoS<sub>2</sub> rather than remaining external to the particles.

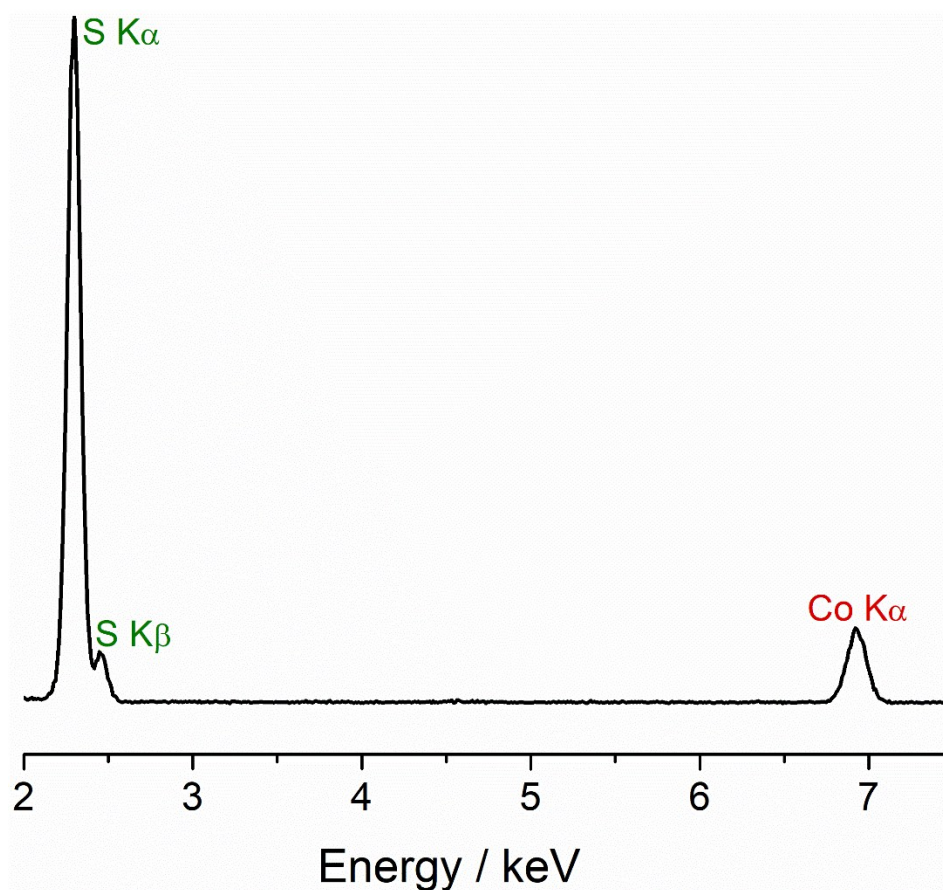

**Figure S10.** EDX spectrum of hollow ZIF-derived  $\text{CoS}_2$  (H- $\text{CoS}_2$ ) composite, corresponding to the particle in Figure 4f. The S/Co atomic ratio was quantified to be around 9.5:1 based on S and Co K-edges, which is significantly larger than the S/Co ratio (2:1) in  $\text{CoS}_2$ , suggesting the existence of elemental sulfur in the cage of H- $\text{CoS}_2$ .

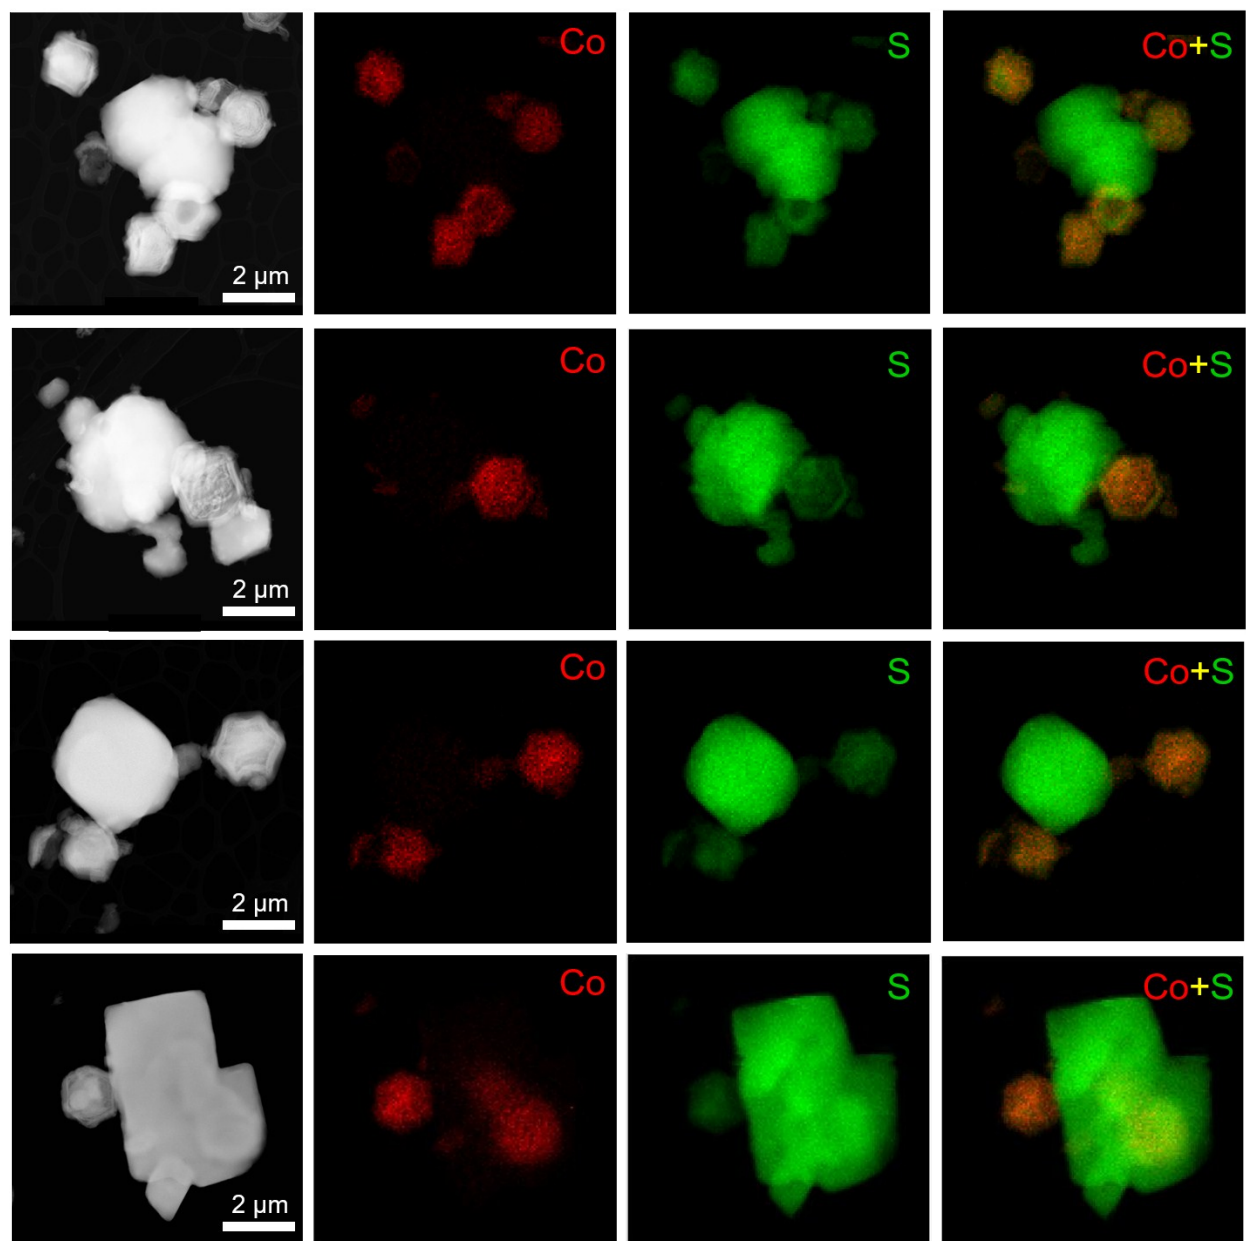

**Figure S11.** Cryo-STEM images of S/hollow ZIF-derived  $\text{CoS}_2$  (S/H- $\text{CoS}_2$ ) composite particles and the corresponding EDX elemental maps of Co (red), S (green) and color overlay of Co and S. Yellow suggests an overlay of Co and S elements while green indicates pure elemental sulfur.

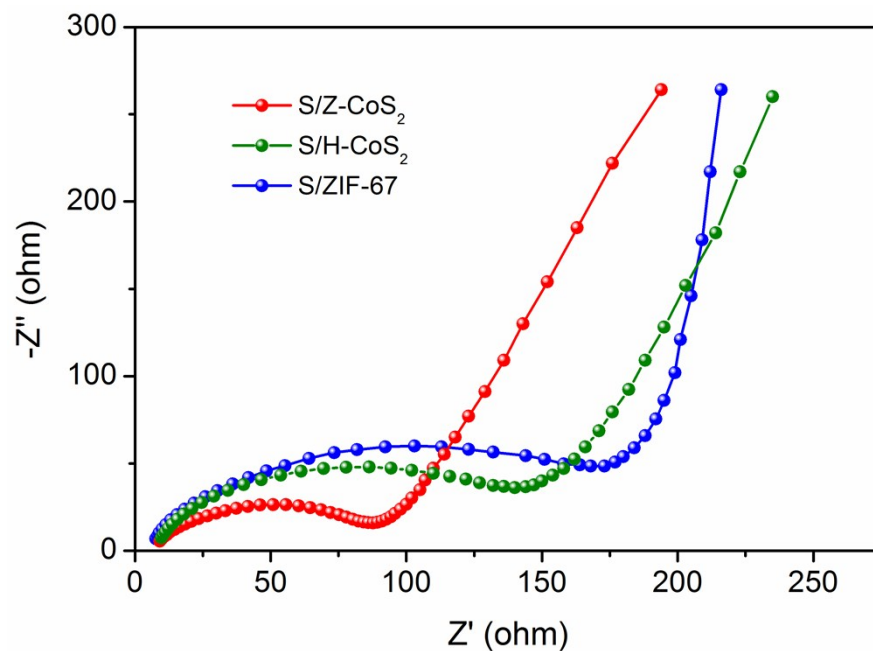

**Figure S12.** EIS spectra of S/Z-CoS<sub>2</sub>, S/H-CoS<sub>2</sub>, and S/ZIF-67.

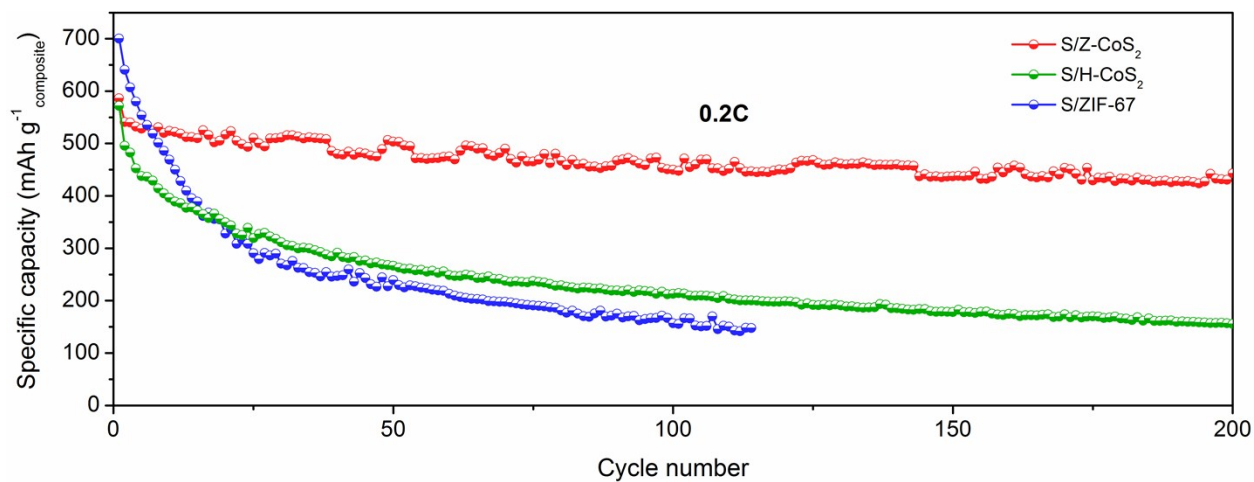

**Figure S13.** Cycling performance of S/Z-CoS<sub>2</sub>, S/H-CoS<sub>2</sub>, and S/ZIF-67 at 0.2 C for 200 cycles. (The capacity values were calculated based on the mass of the composite).

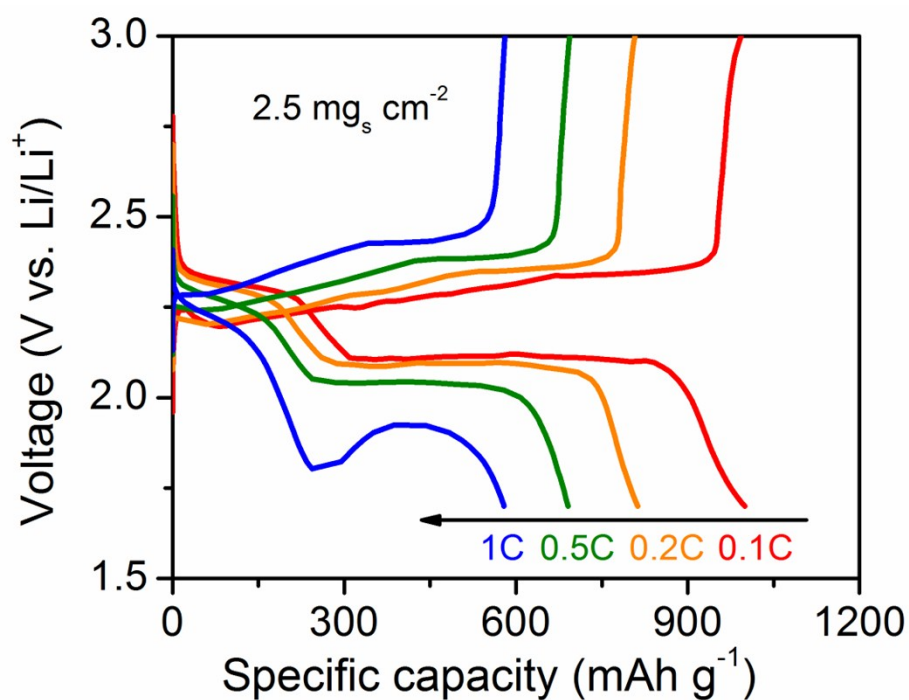

**Figure S14.** Charge/discharge profiles of S/Z-CoS<sub>2</sub> at high loading at various C-rates.

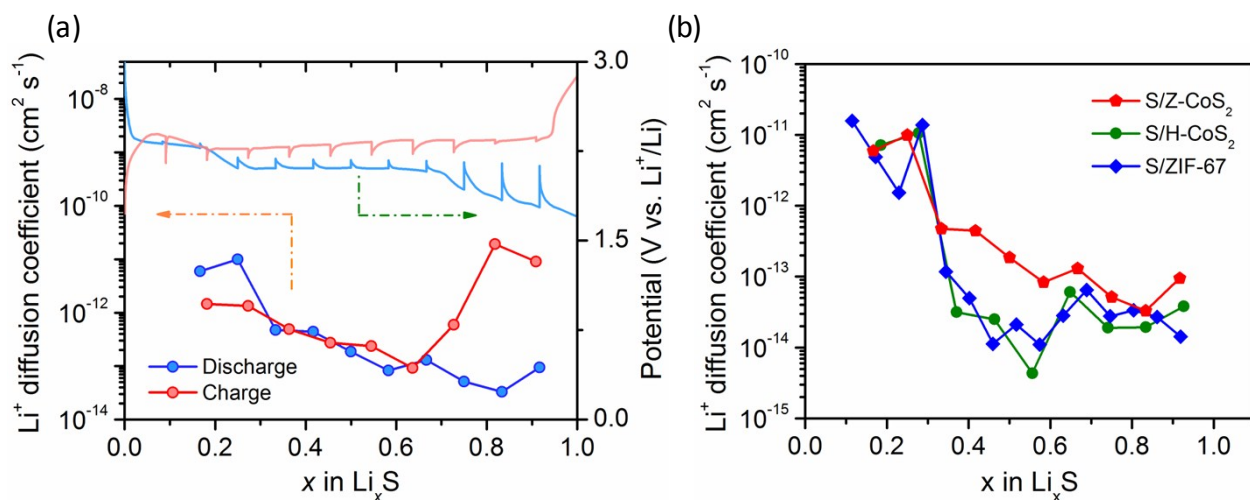

**Figure S15.** (a) GITT profiles of S/Z-CoS<sub>2</sub> and calculated lithium ion diffusion coefficients. (b) Comparison of lithium ion diffusion coefficients of S/Z-CoS<sub>2</sub>, S/H-CoS<sub>2</sub>, and S/ZIF-67.

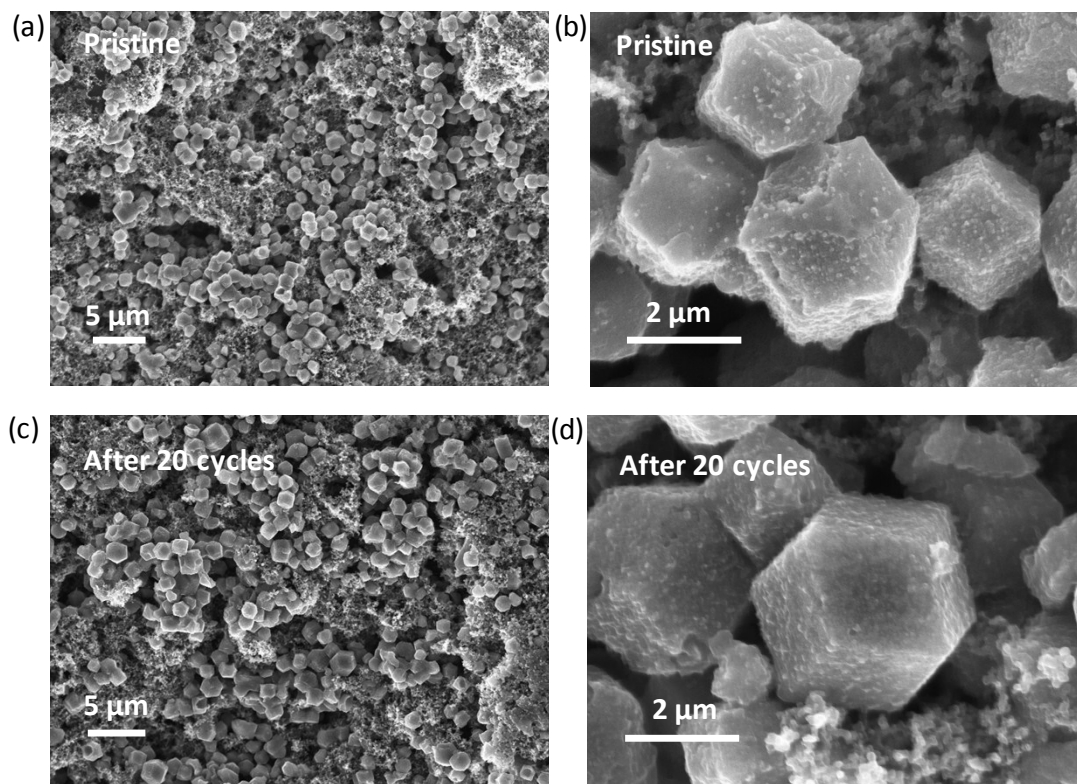

**Figure S16.** SEM images of S/Z-CoS<sub>2</sub> electrodes (a,b) before cycling, and (c,d) after 20 cycles.

**Table S1.** Comparison of electrochemical properties of S/Z-CoS<sub>2</sub> to other reported carbon, metal oxides/sulfides, MOF as sulfur hosts.

| Materials                                                 | Rate performance             | Cycling stability                                                                       | Reference |
|-----------------------------------------------------------|------------------------------|-----------------------------------------------------------------------------------------|-----------|
| S/Z-CoS <sub>2</sub>                                      | 5C, 430 mAh g <sup>-1</sup>  | 0.2C, 750 mAh g <sup>-1</sup> , 200 cycles<br>1C, 440 mAh g <sup>-1</sup> , 1000 cycles | This work |
| Hierarchical micro/mesoporous carbonaceous nanotube       | 2C, 616 mAh g <sup>-1</sup>  | 1C, 558 mAh g <sup>-1</sup> , 160 cycles                                                | Ref. 1    |
| MoO <sub>2</sub>                                          | 2C, 635 mAh g <sup>-1</sup>  | 0.1C, 570 mAh g <sup>-1</sup> , 250 cycles                                              | Ref. 2    |
| Ni-MOF                                                    | 2C, 287 mAh g <sup>-1</sup>  | 0.2C, 520 mAh g <sup>-1</sup> , 200 cycles                                              | Ref. 3    |
| CoS <sub>x</sub>                                          | 2C, 525 mAh g <sup>-1</sup>  | 0.1C, 423 mAh g <sup>-1</sup> , 100 cycles                                              | Ref. 4    |
| CoS <sub>2</sub> /graphene                                | 2C, 1000 mAh g <sup>-1</sup> | 2C, 320 mAh g <sup>-1</sup> , 2000 cycles                                               | Ref. 5    |
| CoS <sub>2</sub> @G/CNT                                   | 4C, 480 mAh g <sup>-1</sup>  | 0.5C, 581 mAh g <sup>-1</sup> , 300 cycles                                              | Ref. 6    |
| Co <sub>9</sub> S <sub>8</sub>                            | 2C, 880 mAh g <sup>-1</sup>  | 0.5C, 250 mAh g <sup>-1</sup> , 1500 cycles                                             | Ref. 7    |
| Activated carbon nanofiber/Co <sub>3</sub> S <sub>4</sub> | 2C, 752 mAh g <sup>-1</sup>  | 1C, 610 mAh g <sup>-1</sup> , 450 cycles                                                | Ref. 8    |

## References

1. K. Mi, Y. Jiang, J. Feng, Y. Qian and S. Xiong, *Adv. Funct. Mater.*, 2016, **26**, 1571-1579.
2. Q. Qu, T. Gao, H. Zheng, Y. Wang, X. Li, X. Li, J. Chen, Y. Han, J. Shao and H. Zheng, *Adv. Mater. Interfaces*, 2015, **2**, 1500048.
3. J. Zheng, J. Tian, D. Wu, M. Gu, W. Xu, C. Wang, F. Gao, M. H. Engelhard, J. G. Zhang, J. Liu and J. Xiao, *Nano Lett.*, 2014, **14**, 2345-2352.
4. M. Lao, G. Zhao, X. Li, Y. Chen, S. X. Dou and W. Sun, *ACS Appl. Energy Mater.*, 2017, **1**, 167-172.
5. Z. Yuan, H. J. Peng, T. Z. Hou, J. Q. Huang, C. M. Chen, D. W. Wang, X. B. Cheng, F. Wei and Q. Zhang, *Nano Lett.*, 2016, **16**, 519-527.
6. G. Zhou, H. Tian, Y. Jin, X. Tao, B. Liu, R. Zhang, Z. W. Seh, D. Zhuo, Y. Liu, J. Sun, J. Zhao, C. Zu, D. S. Wu, Q. Zhang and Y. Cui, *Proc. Natl. Acad. Sci. USA*, 2017, **114**, 840-845.
7. Q. Pang, D. Kundu and L. F. Nazar, *Mater. Horiz.*, 2016, **3**, 130-136.
8. H. Xu and A. Manthiram, *Nano Energy*, 2017, **33**, 124-129.
